# Supplementary material for: Polyparasitism Is Associated with Increased Disease Severity in Toxoplasma gondii-Infected Marine Sentinel Species
Source: PubMed Central journal article supplement (PMC3101184; doi:10.1371/journal.pntd.0001142), 2011-05-24
Supplement: pntd.0001142.s001.pdf [file pntd.0001142.s001.pdf]

**Table S1: Accession numbers for Genbank reference sequences of the ITS1 locus used in phylogenetic reconstruction**

| <b>Species</b>             | <b>Accession Number</b> | <b>Reference</b>        |
|----------------------------|-------------------------|-------------------------|
| <i>Besnoitia besnoiti</i>  | FN257464                | Kiehl et al. (2010)     |
| <i>Hammondia hammondi</i>  | AF096499                | Liddel et al. (1998)    |
| <i>Neospora caninum</i>    | AF038861                | Marsh et al. (1998)     |
| <i>Sarcocystis canis</i>   | DQ176645                | Dubey et al. (2006)     |
| <i>Sarcocystis cruzi</i>   | EF622176                | Rosenthal et al. (2008) |
| <i>Sarcocystis neurona</i> | AY082648                | Cheadler et al. (2002)  |
| <i>Toxoplasma gondii</i>   | AF252408                | Miller et al. (2001)    |
| Coccidia C                 | GU936628                | Present manuscript      |
| HS29                       | HQ184186                | Present manuscript      |
| GFS2                       | HQ184187                | Present manuscript      |
| GFS3                       | HQ184188                | Present manuscript      |
| SW1                        | HQ184185                | Present manuscript      |
