# Supplementary material for: Polyparasitism Is Associated with Increased Disease Severity in Toxoplasma gondii-Infected Marine Sentinel Species
Source: PubMed Central journal article supplement (PMC3101184; doi:10.1371/journal.pntd.0001142), 2011-05-24
Supplement: pntd.0001142.s002.pdf [file pntd.0001142.s002.pdf]

**Table S2: Concatenated genotypes, based upon sequencing at three loci, and pathology grading for *Toxoplasma gondii* infections**

| Identification # | <i>T. gondii</i> genotype | NTS2 allele | B1 allele      | SAG1 allele | Cause of Death | Encephalitis Score |
|------------------|---------------------------|-------------|----------------|-------------|----------------|--------------------|
| CSL3             | I                         | I           |                |             | Incidental     |                    |
| HP12             | I                         | I           | I              |             | Incidental     |                    |
| HP14             | I                         | I           | I              |             | Incidental     | 0                  |
| HS8              | I                         |             | I              |             | Incidental     |                    |
| HS9              | I                         | I           |                |             | Contributing   |                    |
| HS11             | I                         | I           |                |             | Immediate      | 2                  |
| HS16             | I                         | I           |                |             | Incidental     | 2                  |
| HS17             | I                         |             | I              |             | Immediate      | 4                  |
| HS18             | I                         | I           | I              |             | Immediate      | 3                  |
| HS19             | I                         | I           | I              |             | Contributing   | 3                  |
| HS20             | I                         |             | I              |             | Incidental     | 0                  |
| HS23             | I                         | I           |                |             | Incidental     |                    |
| HS28             | I                         | I           |                |             | Incidental     | 1                  |
| HS37             | I                         | I           |                |             | Immediate      | 3                  |
| HS38             | I                         | I           |                |             | Immediate      | 3                  |
| HS39             | I                         | I           |                |             | Immediate      | 3                  |
| SO7              | I                         | I           | I              | I           |                |                    |
| CSL12            | I                         | I           |                |             | Incidental     | 2                  |
| HS46             | I                         |             | I              | I           | Contributing   | 1                  |
| HS50             | I                         | I           | I              |             | Immediate      | 3                  |
| SSL4             | I                         | I           |                |             | Contributing   | 3                  |
| HS56             | I                         |             | I              |             | Immediate      | 3                  |
| HS61             | I                         |             | I              |             | Contributing   | 2                  |
| PSW2             | I                         | I           | I              |             | Incidental     |                    |
| HS67             | I                         | I           | I              | I           | Contributing   | 2                  |
| HS73             | I                         | I           |                |             | Contributing   |                    |
| SSL6             | I                         | I           | I              | I           | Incidental     | 1                  |
| HS74             | I                         |             | I              |             | Contributing   |                    |
| HS79             | I                         |             | I              |             | Incidental     | 0                  |
| HP9              | I                         |             | U <sub>I</sub> |             | Incidental     |                    |
| HS13             | I                         | I           | U <sub>I</sub> |             | Immediate      | 2                  |
| HS14             | I                         | I           | U <sub>I</sub> |             | Immediate      | 3                  |
| GFS9             | I                         | I           | U <sub>I</sub> |             | Incidental     |                    |
| HS57             | I                         |             | U <sub>I</sub> |             | Immediate      | 3                  |

|       |                        |                |        |                     |                     |              |              |   |
|-------|------------------------|----------------|--------|---------------------|---------------------|--------------|--------------|---|
| HS62  | I                      |                |        | U <sub>I</sub>      |                     | Incidental   | 1            |   |
| HS72  | I                      | I              |        | U <sub>I</sub>      | U <sub>I</sub>      | Immediate    | 4            |   |
| ES1   | I                      |                |        | U <sub>I</sub>      |                     | Incidental   |              |   |
| HP10  | II                     | II/III         |        | II/III              | II/III              | Immediate    |              |   |
| HP11  | II                     | II/III         |        | II/III              | II/III              | Immediate    | 2            |   |
| HP18  | II                     | II/III         |        |                     |                     | Immediate    | 2            |   |
| HS26  | II                     | II/III         |        |                     |                     | Incidental   | 0            |   |
| GFS3  | II                     | II/III         |        |                     |                     | Contributing |              |   |
| GFS10 | II                     |                |        | II/III              |                     | Incidental   | 1            |   |
| HS81  | II                     | II/III         |        | II/III              |                     | Immediate    | 3            |   |
| SSL8  | II                     | II/III         |        | II/III              |                     | Incidental   | 0            |   |
| HP27  | X                      | X              |        | X                   |                     | Contributing |              |   |
| HP28  | X                      | X              |        |                     |                     | Incidental   |              |   |
| HS25  | X                      |                |        | X                   |                     | Contributing | 2            |   |
| GFS5  | X                      | X              |        | X                   |                     |              |              |   |
| GFS7  | X                      | X              |        |                     |                     |              |              |   |
| HS59  | X                      |                |        | X                   |                     | Contributing | 1            |   |
| HP37  | X                      | X              |        | X                   |                     |              | 0            |   |
| HS12  | Mixed Infection: I, II | I              | I      | II/III              | I                   | II/III       | Incidental   | 0 |
| HS49  | Mixed infection: I, II | I              | I      | II/III              | I                   |              | Immediate    | 4 |
| GFS11 | Mixed infection: I, II | I              |        | U <sub>I</sub>      | U <sub>II/III</sub> |              | Contributing | 2 |
| GFS13 | Mixed Infection: I, II | U <sub>I</sub> | I      | U <sub>II/III</sub> | I                   | II/III       | Incidental   | 1 |
| SSL7  | Mixed infection: I, II | I              | II/III | I                   |                     |              | Incidental   | 0 |
| HS75  | Mixed infection: I, II | I              | II/III |                     |                     |              | Immediate    | 3 |
| HS77  | Mixed infection: I, II | I              | II/III | I                   | U <sub>II/III</sub> | I            | Incidental   |   |
| HP33  | Mixed Infection: I, X  | X              | I      | X                   |                     |              | Incidental   | 0 |
| HS7   | Mixed Infection: I, X  | I              | I      | X                   |                     |              | Incidental   | 2 |
| PSW1  | Mixed Infection: I, X  | I              | X      | X                   |                     |              | Incidental   | 0 |
| HS83  | Mixed Infection: II, X | II/III         | X      | II/III              |                     |              | Immediate    | 3 |
| HS3   | Atypical               | II/III         |        | I                   |                     | II/III       | Contributing | 2 |
| HS6   | Atypical               | I              |        | I                   | U <sub>II/III</sub> |              | Incidental   | 0 |
| HS10  | Atypical               | I              | II/III | U <sub>I</sub>      |                     |              | Contributing | 1 |
| HS21  | Atypical               | II/III         |        | I                   |                     |              |              |   |
| HS30  | Atypical               | I              |        | U <sub>II/III</sub> |                     | I            | Incidental   |   |
| GFS4  | Atypical               | I              | II/III | II/III              |                     |              | Immediate    | 2 |
| HS60  | Atypical               | I              | II/III | I                   |                     | I            | Immediate    | 2 |
| HS66  | Atypical               | II/III         |        | I                   |                     |              | Contributing |   |

|      |          |                |                |        |        |                |
|------|----------|----------------|----------------|--------|--------|----------------|
| HS69 | Atypical | II/III         | I              | I      |        |                |
| KW1  | Atypical | X              | II/III         | X      |        |                |
| HP21 | Atypical | U <sub>x</sub> |                | II/III | X      | Immediate 3    |
| GFS1 | Atypical | II/III         | U <sub>x</sub> |        |        |                |
| GFS6 | Atypical | X              | II/III         |        |        |                |
| HP39 | Atypical | X              | X              | II/III |        | Incidental 0   |
| HP40 | Atypical | II/III         | X              | X      | II/III | Incidental 0   |
| HP5  | Atypical | U <sub>x</sub> | I              | X      |        | Incidental 0   |
| GFS2 | Atypical | X              | I              |        |        |                |
| HS58 | Atypical | I              | U <sub>x</sub> | I      |        | Immediate 4    |
| HS76 | Atypical | X              |                | I      |        | Immediate 3    |
| HS4  | Atypical | I              | II/III         | X      |        | Incidental 1   |
| HP4  | Atypical | U              |                |        |        | Contributing 1 |
| SO2  | Atypical |                | X              | U      |        | Incidental     |

<sup>a</sup> Identification numbers also indicate species identity for each individual: CSL = California sea lion, HP = harbor porpoise, HS = harbor seal, SO = Northern sea otter, SSL = Steller sea lion, PSW = Pygmy sperm whale, GFS = Guadalupe fur seal, ES = Elephant seal, KW = Killer whale.

<sup>b</sup> Type I and Type I-like alleles are shaded in black, Type II/III and Type II/III-like alleles in dark grey, Type X and Type X-like alleles in pale grey, and unique alleles in white.

<sup>c</sup> Sequences were classified as archetypal I, II/III or X or as Type I-like, II/III-like or X-like alleles, (represented by U<sub>I</sub>, U<sub>II/III</sub>, or U<sub>X</sub>, respectively) when polymorphisms were present in addition to allele-defining archetypal polymorphisms. A sequence was identified as a unique allele (U) when it was sufficiently divergent from archetypal alleles.

<sup>d</sup> Mixed infections are infections for which multiple genotypes with distinct tissue tropisms were amplified from a single host. Atypical infections are infections of genotypes with unique alleles and/or unique combinations of alleles or of multiple genotypes.

<sup>e</sup> “Cause of Death” and “Encephalitis Score” columns provide pathology grading, when available. “Cause of Death” indicates whether protozoal disease was an immediate, contributing, or incidental cause of death. “Encephalitis Score” ranges from absent (0) to severe (4) and indicates the severity of protozoal encephalitis.
